# Supplementary material for: 53BP1 Integrates DNA Repair and p53-Dependent Cell Fate Decisions via Distinct Mechanisms
Source: PubMed Central journal article supplement (PMC5065530; doi:10.1016/j.molcel.2016.08.002), 2016-10-06
Supplement: mmc1.pdf [file mmc1.pdf]

**Molecular Cell, Volume 64**

**Supplemental Information**

**53BP1 Integrates DNA Repair and p53-Dependent  
Cell Fate Decisions via Distinct Mechanisms**

**Raquel Cuella-Martin, Catarina Oliveira, Helen E. Lockstone, Suzanne Snellenberg, Natalia Grolmusova, and J. Ross Chapman**

**A**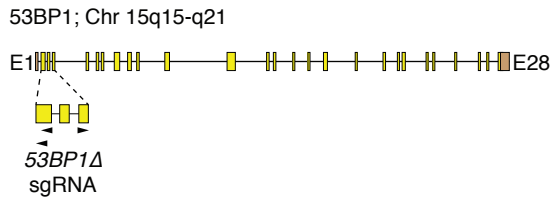**B**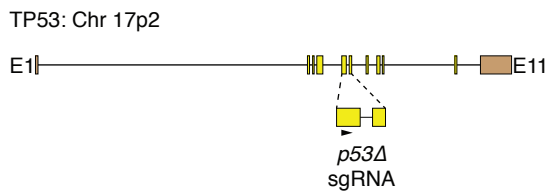**C**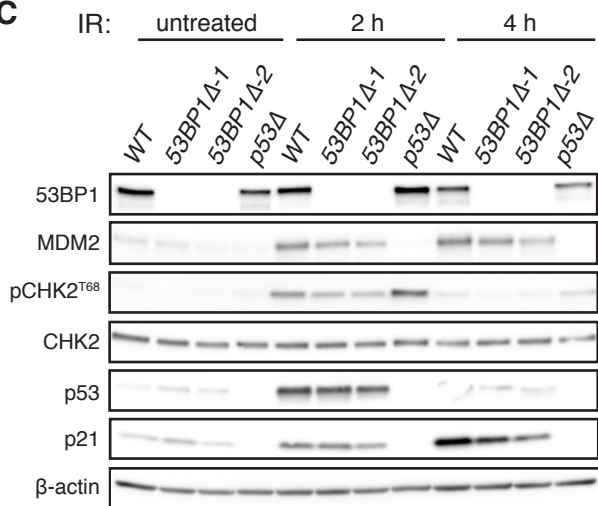**D**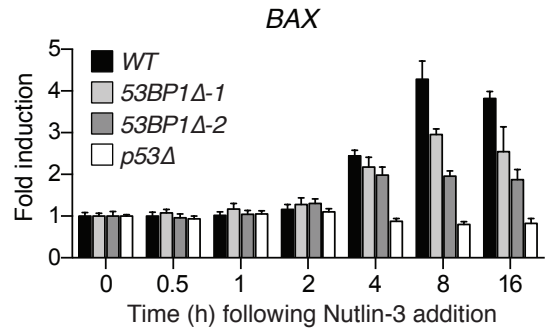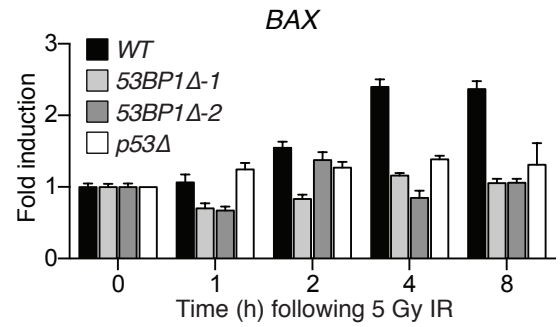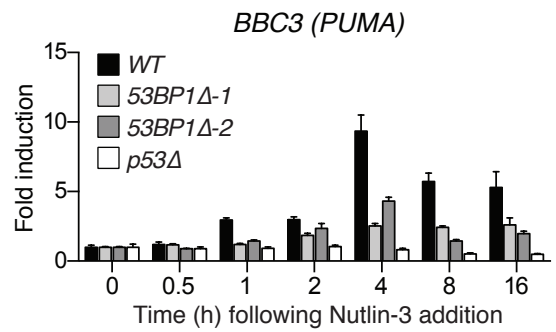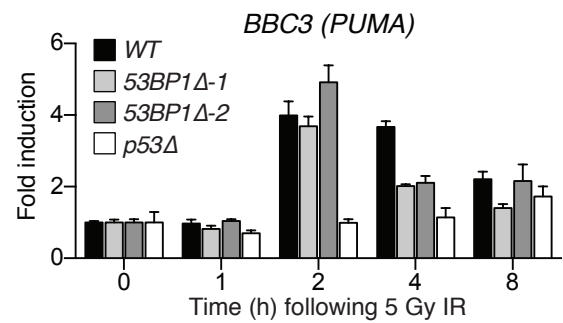**Figure S1**

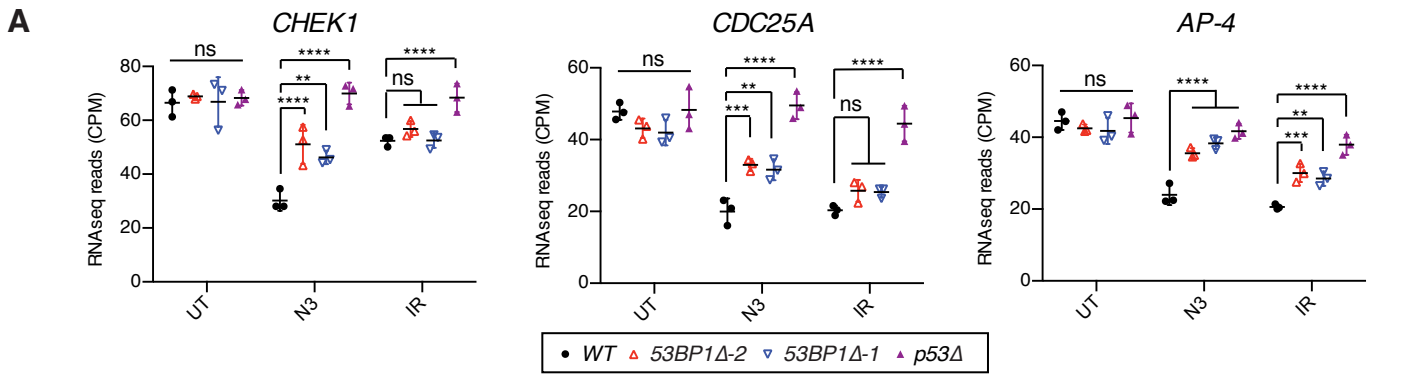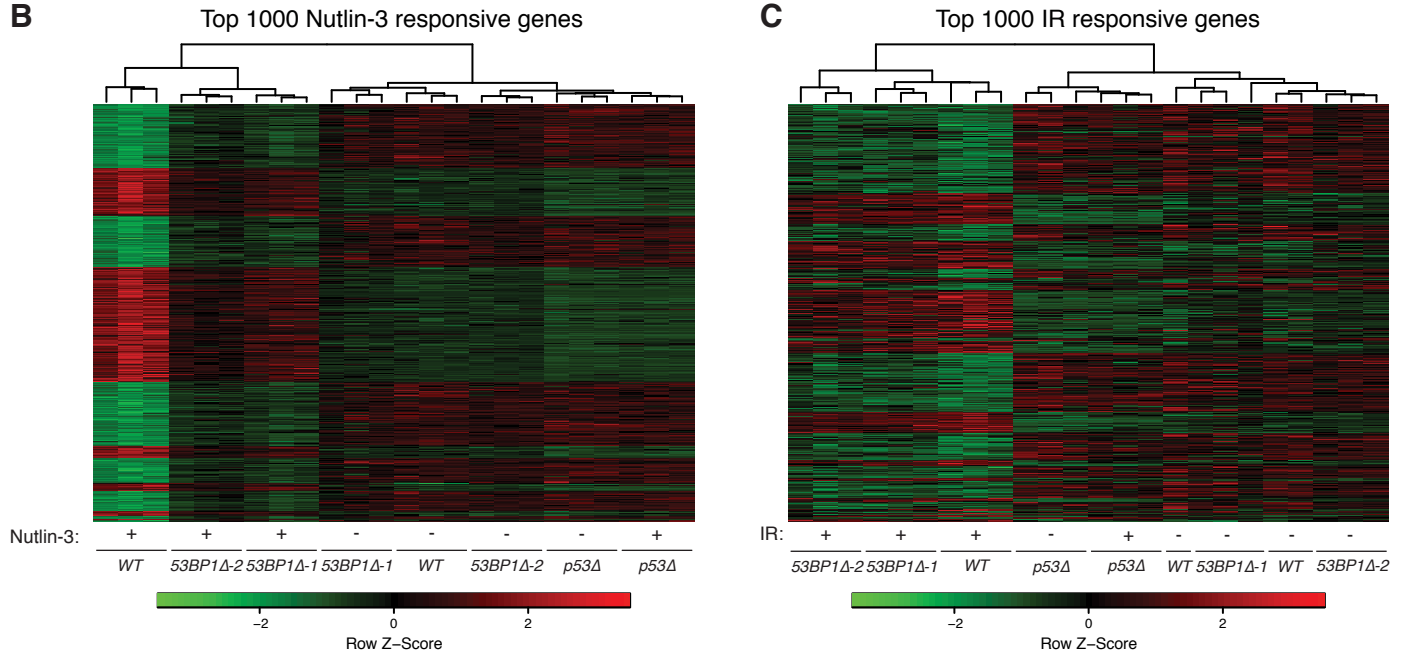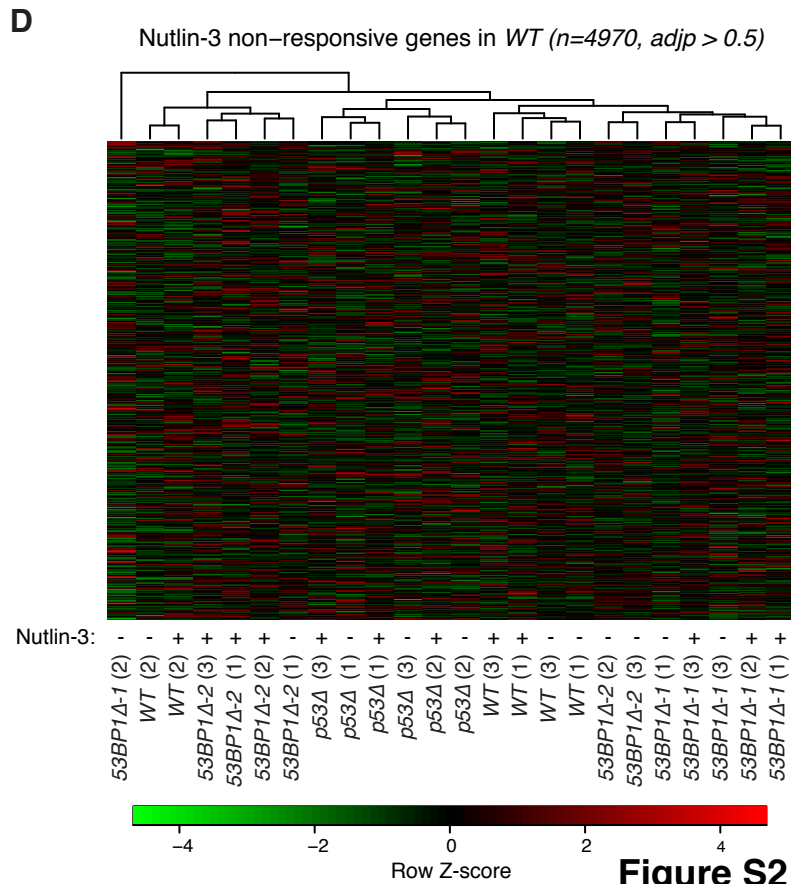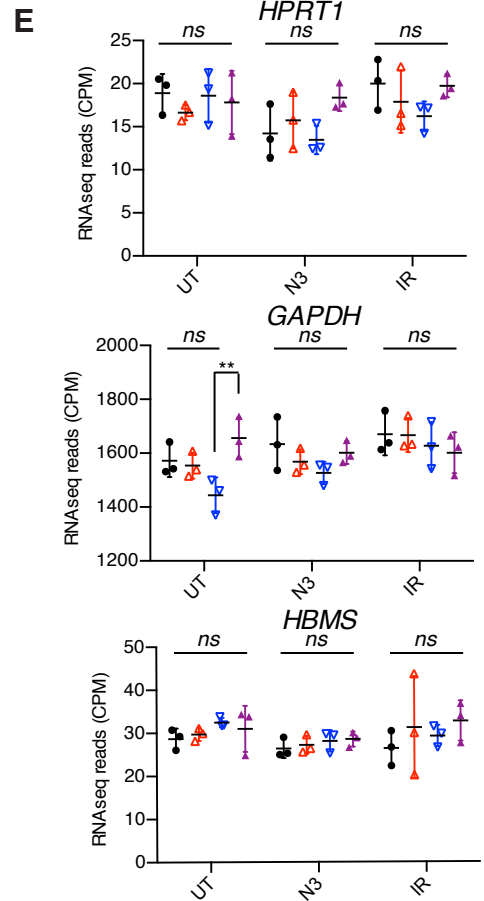

**Figure S2**

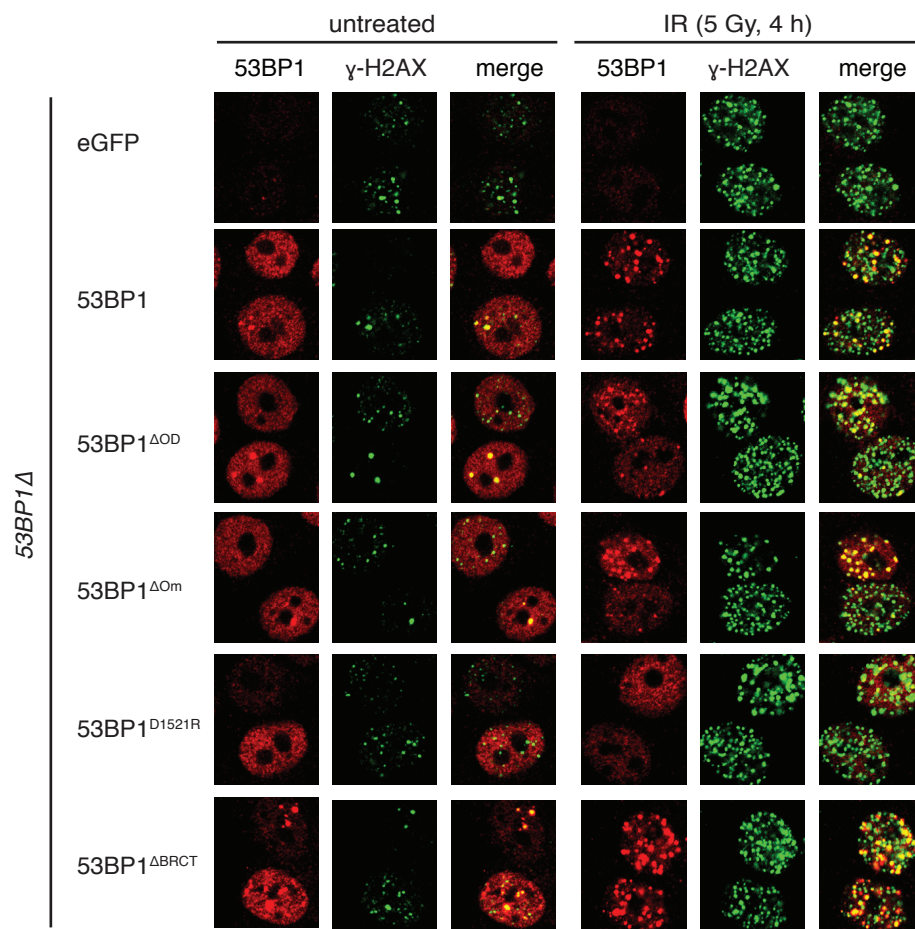

Figure S3

**A**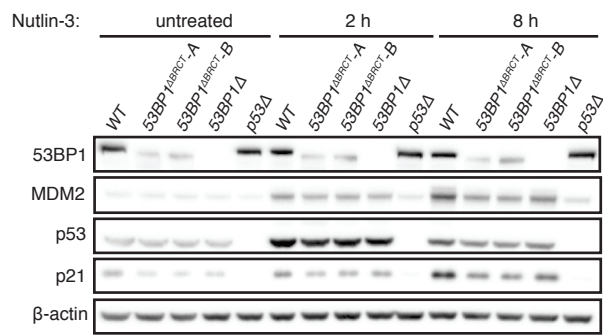**B**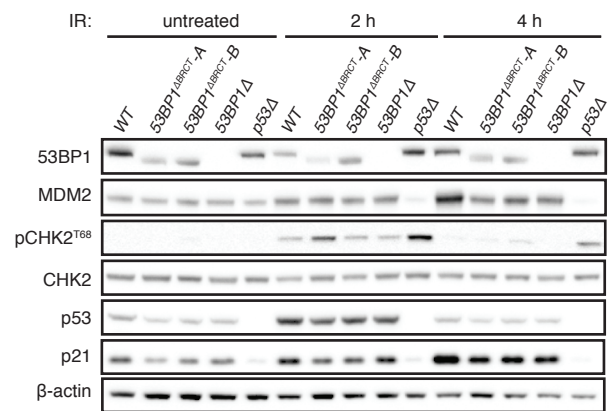**C**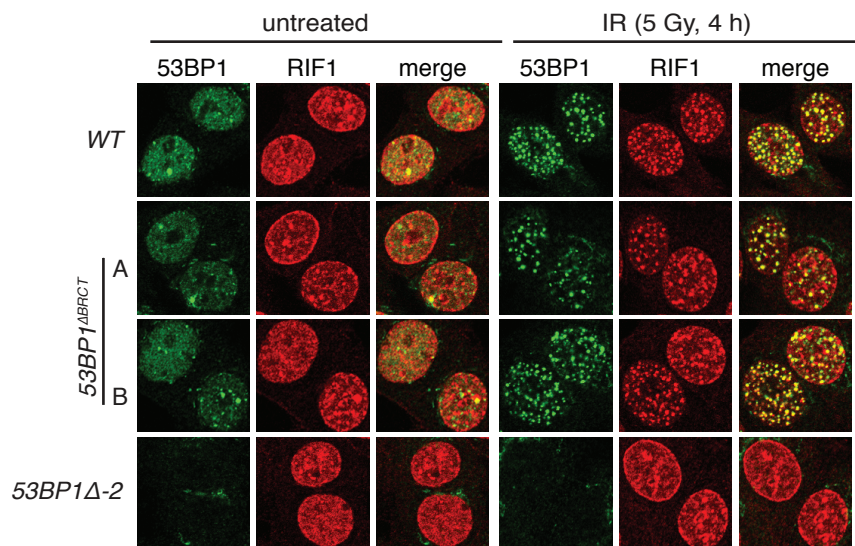**Figure S4**

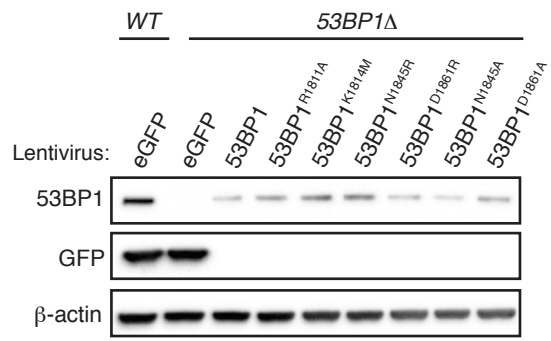

Figure S5

**A**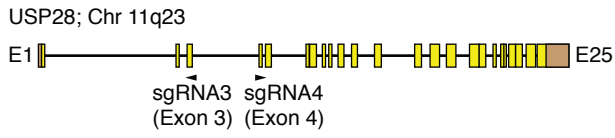**B**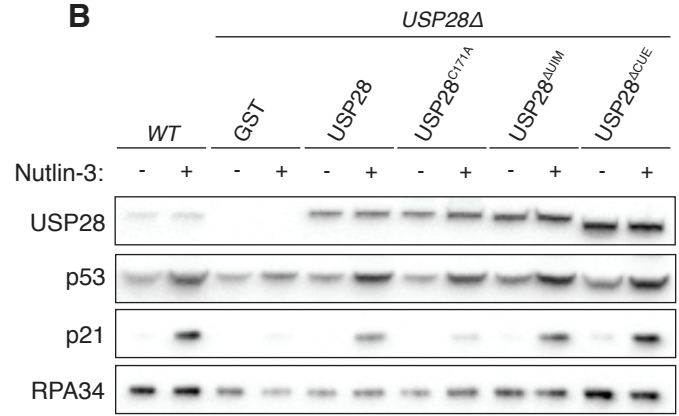**C**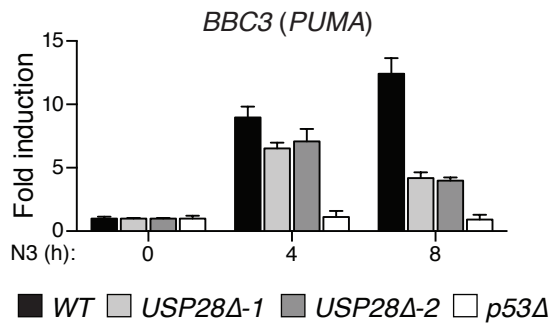**Figure S6**

**A**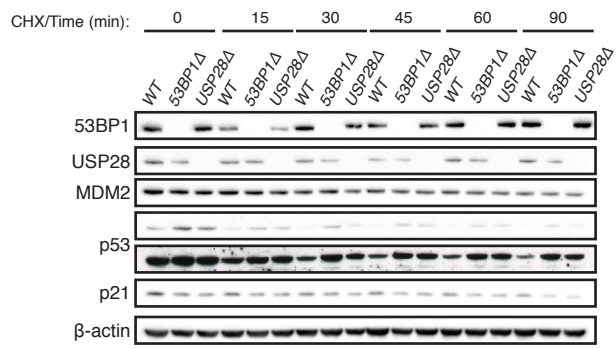**B**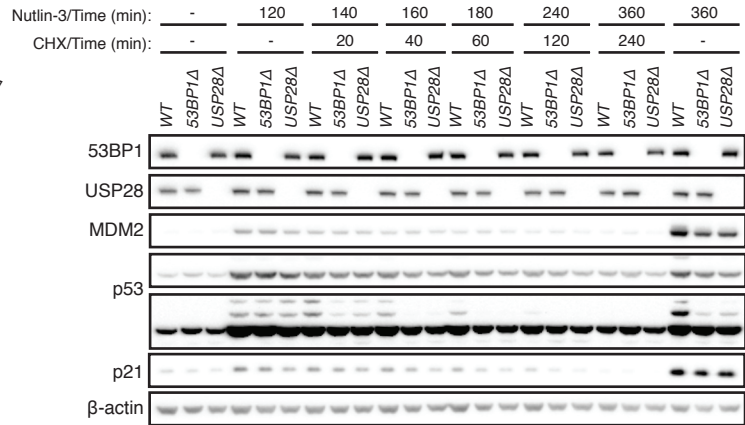**C**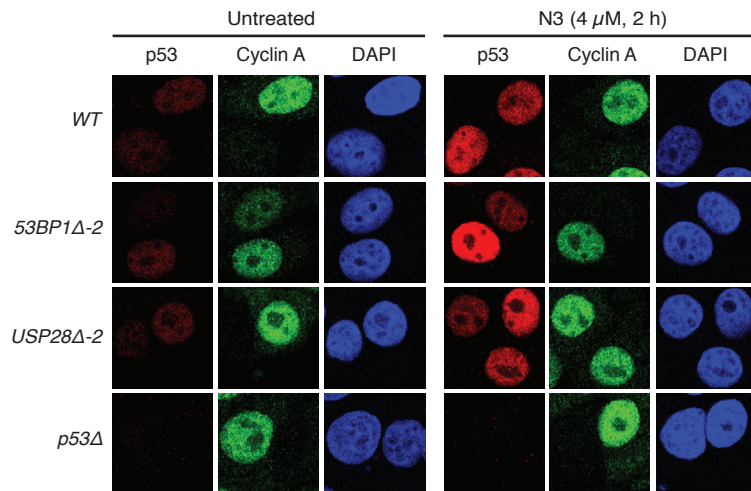**Figure S7**



## SUPPLEMENTARY FIGURE LEGENDS

### **Supplementary Figure S1, related to Figure 1. 53BP1 is required for optimal p53-dependent transactivation events.**

Schematic representations of the human *53BP1* (A) and *TP53* (B) loci, illustrating the hybridization sites of the gRNAs selected for the generation of *53BP1* $\Delta$  and *p53* $\Delta$  cell-lines in this study (gRNA sequences in Supplementary Table S1). (C) Immunoblot analysis of lysates prepared from untreated or IR-treated (5 Gy) cells of indicated genotype. (D) 53BP1-loss impairs IR-induced p53-dependent transactivation events. Total RNA was purified from cells treated with N3 (4  $\mu$ M) or IR (5 Gy) and monitored for the abundance of indicated p53-responsive transcripts by RT-qPCR. Data is representative of two independent experiments, mean  $\pm$  SD.

### **Supplementary Figure S2, related to Figure 1. 53BP1 is an enhancer of p53-dependent transcriptional programs.**

(A) 53BP1 is required for p53-dependent transcriptional repression events. Representative p53-responsive transcripts from three RNA-seq replicates. Total RNA was sequenced from indicated MCF-7 lines following N3 (4  $\mu$ M, 8 h), IR (5 Gy, 4 h) or control treatments. CPM, counts per million; *ns*, non significant; \* $p < 0.05$ ; \*\* $p < 0.01$ ; \*\*\* $p < 0.001$ ; \*\*\*\* $p < 0.001$  (two-way ANOVA). Bars represent mean  $\pm$  SD. (B), (C) RNA-seq results and reproducibility across biological replicates. Heatmaps showing relative expression levels for each independent biological replicate of each condition for the top 1000 treatment-responsive genes, in respect to the untreated control samples. Unsupervised hierarchical clustering was used to cluster the samples based on expression levels of the respective set of 1000 genes for N3 and IR treatments. (D) Normal expression of Nutlin-3 non-responsive genes in *53BP1* $\Delta$  and *p53* $\Delta$  MCF-7. Heatmaps showing relative expression levels for each independent biological replicate of each condition for the 4970 treatment non-responsive genes in *WT* MCF-7, in respect to the untreated control samples. Unsupervised hierarchical clustering was used to cluster the samples based on expression levels of the respective set of 4970 genes for N3 and IR treatments. (E) As in A, but for three commonly employed reference transcripts.

### **Supplementary Figure S3, related to Figure 2. Expected nuclear localization patterns of N3-response defective 53BP1 mutants.**

The localization and IR-dependent recruitment patterns of the indicated 53BP1 mutant proteins was analyzed in stably transduced *53BP1* $\Delta$  MCF-7 lines following mock or IR (5Gy 4 h) treatment. Cells were fixed, immunostained with indicated antibodies, and then processed by indirect immunofluorescence.

Notably, 53BP1 oligomerization mutant proteins formed residual IRIF, consistent with a previous report (Lottersberger et al., 2013).

**Supplementary Figure S4, related to Figure 3. 53BP1 dependent p53 regulation and DSB repair activities are distinct and separable.**

(A), (B) *53BP1<sup>ΔBRCT</sup>* cells show reduced MDM2 and p21 induction following N3 and IR treatments. Western blot analysis of lysates prepared from indicated cell-lines following treatment with 4 μM N3 (A) or 5 Gy IR (B) relative to untreated control samples. (C) Unlike *53BP1Δ* cells, *53BP1<sup>BRCTΔ</sup>* cells are proficient in supporting RIF1 recruitment into IR-induced foci. Cells mock-treated or irradiated (5 Gy, 4 h), were fixed, immunostained with indicated antibodies, and processed by indirect immunofluorescence.

**Supplementary Figure S5, related to Figure 4. The 53BP1 BRCT domain mediates bivalent interactions with p53 and USP28.**

Western blot showing stable expression of indicated WT and 53BP1 BRCT mutants in lentivirus-transduced *53BP1Δ* cells.

**Supplementary Figure S6, related to Figure 5. USP28 is a novel component of the p53-53BP1 axis.**

(A) Schematic representation of the human *USP28* locus depicting the hybridization sites for each gRNA used to generate *USP28Δ* cell-lines (gRNA sequences in supplementary Table S1). (B) USP28 catalytic activity is required for its p53-regulatory role. Indicated WT and mutant USP28 transgenes were stably expressed in *USP28Δ* cells following lentivirus-mediated transduction. Lysates were prepared from cells following treatment with N3 (4 μM, 8 h), and immunoblotted with indicated antibodies. (C) USP28-loss impairs N3-induced p53-dependent PUMA transactivation. Total RNA was purified from cells treated with N3 (4 μM) and monitored for the abundance of BBC3 (PUMA) transcript for the indicated times. Data is representative of two independent experiments, mean ± SD.

**Supplementary Figure S7, related to Figure 7. Normal p53 stability and localization in 53BP1Δ and USP28Δ cells.**

(A) Steady-state p53 half-life in WT, *53BP1Δ* and *USP28Δ* cells. p53 half-life analysis was performed in time-course experiments following cycloheximide addition to halt *de novo* protein synthesis. Cell lysates prepared at indicated time-points following cycloheximide addition were immunoblotted with indicated antibodies. (B) p53 half-life in N3-treated WT, *53BP1Δ* and *USP28Δ* cells. Similar to B, except cycloheximide was added 2 h following p53-activation by N3-treatment. (C) Normal p53 nuclear localization in WT, *53BP1Δ* and *USP28Δ* cells. Cells were treated with 4 μM N3 for 2 h or left untreated,

were fixed and immunostained with the monoclonal p53 DO-7 antibody. Cyclin A-counterstaining enabled discrimination of G1 (Cyclin A negative) and S/G2 (Cyclin A positive) cell populations, and provided no evidence for cell-cycle-dependent defects in p53 localization.

|                 | <b>Gene #</b> | <b>Nutlin-3</b> | <b>IR</b> |
|-----------------|---------------|-----------------|-----------|
| <i>WT</i>       | Activated     | 3559            | 1043      |
|                 | Repressed     | 3318            | 1343      |
| <i>53BP1Δ-1</i> | Activated     | 1143            | 497       |
|                 | Repressed     | 1096            | 686       |
| <i>53BP1Δ-2</i> | Activated     | 1366            | 551       |
|                 | Repressed     | 1624            | 767       |
| <i>p53Δ</i>     | Activated     | 10              | 6         |
|                 | Repressed     | 3               | 19        |

**Supplementary Table S1, related to Figure 1.** Number of genes showing significant changes (*adjusted p-value* <0.05) in RNA-seq experiments upon N3 and IR treatments with respect to the corresponding untreated control.

## **EXTENDED EXPERIMENTAL PROCEDURES**

### ***Protein analysis: SDS/PAGE-Western Blot***

Whole cell protein extracts were isolated using Benzonase buffer [25 mM Tris (pH 8.0), 40 mM NaCl, 0.05% SDS, 2 mM MgCl<sub>2</sub>, 10 U/ml Benzonase (Sigma-Aldrich), 0.05% (v/v) phosphatase inhibitor cocktail 3 (P5726; Sigma-Aldrich) and protease inhibitors (Complete, Roche)], diluted in 3X Laemmli buffer and boiled. SDS-PAGE was performed using NuPAGE® Novex® (Life Technologies) or Criterion® (Bio-Rad) gradient acrylamide gels before transfer onto 0.45 µM nitrocellulose membranes (Life Technologies). Primary antibodies used in this study are listed below. Proteins were detected using HRP-conjugated secondary antibodies and enhanced chemiluminescence (Clarity, Bio-Rad). Signals were acquired digitally on a Gel Doc™ XR system (Bio-Rad).

### ***Immunofluorescence assays***

Cells were seeded in coverslips in 6-well plates at a cell density of 4x10<sup>5</sup> cells/well. After treatments, cells were fixed in a 2% *p*-formaldehyde solution and permeabilized with 0.2% (v/v) Triton-X100 in PBS. Coverslips were blocked in 3% (w/v) BSA/0.1% (v/v) Triton-X100 in PBS prior to sequential incubations with primary (listed below) and secondary antibodies (Alexa Fluor 488, 594 and 648; Molecular Probes). Images were captured in a confocal scanning microscope (LSM 510 Meta, Zeiss).

### ***Clonogenic IR survival assay***

The sensitivity of cells plated on 10 cm dishes in triplicate and exposed to indicated X-ray doses (CellRad, Faxitron), was assessed relative to non-irradiated control plates. Fourteen days after treatment, plates were stained using crystal violet dye and colonies counted.

### ***Real time quantitative PCR (RT-qPCR)***

Gene expression was determined by RT-qPCR. Trizol/chloroform-extracted total RNA was further purified with the RNeasy Mini Kit (Qiagen) incorporating a DNaseI step (Qiagen) to remove DNA contamination. cDNA was generated from 1 µg of total RNA using the iScript® cDNA Synthesis Kit (Bio-Rad). qPCR was carried out using QuantiFast SYBR Green Master Mix (Qiagen) and transcript-specific primer pairs (sequences listed below). PCR reactions were analysed on a CFX96® Real Time analyzer (Bio-Rad) with the following conditions: enzyme activation-5 min 95 °C; 40 cycles denaturation-10 s 95 °C annealing/extension-30 s 60 °C; final melting curve-15s 65 °C, 15 s 95 °C. Cycle threshold values (C<sub>T</sub>) were used to perform quantification and analysis using CFX Manager software (Bio-Rad).

Hypoxanthine-guanine phosphoribosyl-transferase 1 (*HPRT1*) was used as housekeeping gene for normalization. All values were presented as fold-changes compared to the appropriate control.

### ***Whole transcriptome analysis: RNA-seq***

Libraries prepared from ribosomal-RNA depleted total RNA isolates (Ribo-Zero rRNA removal kit, Illumina) were subjected to RNA-seq analysis. Results presented are based on three biological experimental replicates for each condition and genotype. Briefly, sample preparation was carried out according to Illumina guidelines using in-house adapters for library preparation (Lamble et al., 2013). Library quantification and quality control was performed using Picogreen and TapeStation measurements, and equimolar quantities of each library pooled into a 36-plex. 36-plex pools were sequenced (100 bp paired-end reads) across two lanes of a HiSeq4000 sequencer (Illumina). Following subtraction of low-quality reads and duplicate reads (Picard Tools MarkDuplicates), between 10-15 million high-quality reads per sample were analyzed and aligned to the human reference genome (GRCh37), using TopHat2 (Kim et al., 2013). Counts for Ensembl-annotated genes were summarised from the mapped reads, and filtered to exclude genes with fewer than 10 reads on average per sample. Analysis for differential expression was performed using the edgeR package (Robinson et al., 2010). All raw RNA-sequencing datasets generated in this study will be archived and made publically available at the European Nucleotide Archive upon publication.

### ***Immunoprecipitation***

Cells initially lysed in Benzonase Lysis Buffer [20 mM HEPES (pH 7.9), 40 mM KCl, 2 mM MgCl<sub>2</sub>, 12% glycerol, 0.5% CHAPS, 50 U/ml Benzonase (Novagen), 0.05 % (v/v) phosphatase inhibitors (P0044 and P5726; Sigma-Aldrich) and protease inhibitors (Complete, Roche)], were supplemented with KCL to a 450 mM final concentration and gently mixed for 30 min at 4°C. Following clarification by centrifugation, lysates were then cassette dialyzed (Slide-A-Lyzer™ MINI, Thermo Fisher Scientific) into dialysis buffer [20 mM HEPES (pH 7.9), 100 mM KCl, 0.2 mM EDTA, 10 % Glycerol, 0.5 mM DTT, 0.5 mM PMSF, 5 mM NaF, 10 mM b-glycerolphosphate]. Flag-HA-53BP1 or endogenous p53 complexes were purified from 1-2 mg total protein using anti-FLAG® M2 magnetic resin (Sigma-Aldrich) or p53 DO-1 antibody (Santa Cruz Biotechnology) coupled to protein G Dynabeads (Invitrogen). Magnetically purified protein-bead complexes washed extensively in dialysis buffer were either boiled in Laemmli buffer or eluted in 3X Flag peptide (Sigma-Aldrich) according to manufacturers instructions.

### ***G1/S checkpoint analysis***

The G1/S checkpoint was assessed by BrdU incorporation. Briefly, cells were synchronised in G0 by serum starvation for 24 h and further released in medium containing 0.25 µg/ml nocodazole to prevent G2/M-phase cells recycling. 4 h post-release, G1-phase cells were treated with mock- or 4 Gy irradiation. Twelve and 18 h later, cells were then pulsed for 30 min with 10 µM BrdU, collected and fixed overnight in ice-cold 70% ethanol. DNA denaturation was performed using a solution of 0.2 mg/ml of pepsin (Sigma-Aldrich) in 2 M HCl. BrdU was detected using an anti-BrdU-FITC conjugated antibody (AbD Serotec) and a solution of PI/RNaseA (10 µg/ml and 0.1 mg/ml respectively) was used for total DNA staining. Cells were analysed in an Attune NxT flow cytometer (Life Technologies) and data processed using FlowJo software (Three Star Inc).

### ***Statistical methods***

Prism 6 software (GraphPad Software Inc.) was typically used for statistical analysis of datasets, with the exception of the RNAseq analyses that were performed using R ([www.r-project.org](http://www.r-project.org)).

### ***CRISPR-Cas9 guide-RNAs (gRNAs) used to generate knockout and 53BP1<sup>ABRCT</sup> cell lines.***

| <b>Target gene/Name</b> | <b>Sequence (5'-3')</b> | <b>Description</b>             |                                       |
|-------------------------|-------------------------|--------------------------------|---------------------------------------|
| TP53                    | gtgcagctgtgggtgattc     | Targeted to exon 5, antisense. |                                       |
| 53BP1                   | 1                       | gaatccaactgacttccagt           | Targeted to exon 2, antisense         |
|                         | 2                       | gctgagaatcttcaattatc           | Targeted to exon 2, antisense         |
|                         | 3                       | gaacgaggagacggtaatagt          | Targeted to exon 3, sense.            |
| USP28                   | 1                       | tgtagcaacagtgtcttgac           | Targeted to exon 3, antisense.        |
|                         | 2                       | tgccattgctttgagtctac           | Targeted to exon 4, sense.            |
| 53BP1                   | BRCT Nt 1               | ctgtgagagtggagacaaca           | Targeted to BRCT 1 N-term, antisense. |
|                         | BRCT Nt 2               | tttgtgagcccctgtgagag           | Targeted to BRCT 1 N-term, sense.     |
|                         | BRCT Ct                 | ctcattgtggggagagaat            | Targeted to BRCT 2 C-term, sense.     |

**53BP1 lentiviral plasmids used throughout this study.**

| <b>Name</b>            |                                   | <b>Description</b>                         | <b>Application</b>          |
|------------------------|-----------------------------------|--------------------------------------------|-----------------------------|
| pLenti-PGK-PURO-DEST   | eGFP                              | Control plasmid                            | N3 survival studies         |
|                        | GST                               | Control plasmid                            |                             |
|                        | 53BP1                             | Full length 53BP1 ORF                      |                             |
|                        | 53BP1 <sup>ΔBRCT</sup>            | Deletion of BRCT tandem domain             |                             |
|                        | 53BP1 <sup>ΔOD</sup>              | Deletion of Oligomerisation domain         |                             |
|                        | 53BP1 <sup>ODm</sup>              | Mutation YYVD1258AAAA                      |                             |
|                        | 53BP1 <sup>20AQ</sup>             | Mutation of 20 N-terminal S/TQ sites       |                             |
|                        | 53BP1 <sup>D1521R</sup>           | Mutation of the Tudor domain               |                             |
|                        | 53BP1 <sup>L1619A</sup>           | Mutation of the UDR domain                 |                             |
|                        | 53BP1 <sup>R1811A</sup>           | Mutation in BRCT P-binding pocket          |                             |
|                        | 53BP1 <sup>K1814M</sup>           | Mutation in BRCT P-binding pocket          |                             |
|                        | 53BP1 <sup>N1845R</sup>           | Mutation in p53 binding interphase         |                             |
|                        | 53BP1 <sup>N1845A</sup>           |                                            |                             |
|                        | 53BP1 <sup>D1861R</sup>           | Mutation in p53 binding interphase         |                             |
|                        | 53BP1 <sup>D1861A</sup>           |                                            |                             |
|                        | USP28                             | Full length USP28 ORF                      |                             |
|                        | USP28 <sup>ΔUBA</sup>             | Deletion of predicted CUE domain (S20-E65) |                             |
| USP28 <sup>ΔUIM</sup>  | Deletion of UIM domain (K99-I116) |                                            |                             |
| USP28 <sup>C171A</sup> | Catalytic dead USP28 version      |                                            |                             |
| pHAGE-N-FLAG-HA-DEST   | eGFP                              | Control plasmid                            | Interaction studies (Co-IP) |
|                        | 53BP1                             | Full length 53BP1 ORF                      |                             |
|                        | 53BP1 <sup>ΔBRCT</sup>            | Deletion of BRCT tandem domain             |                             |
|                        | 53BP1 <sup>ODm</sup>              | Mutation YYVD1258AAAA                      |                             |
|                        | 53BP1 <sup>D1521R</sup>           | Mutation of the Tudor domain               |                             |
|                        | 53BP1 <sup>R1811A</sup>           | Mutation in BRCT P-binding pocket          |                             |
|                        | 53BP1 <sup>K1814M</sup>           | Mutation in BRCT P-binding pocket          |                             |
|                        | 53BP1 <sup>N1845R</sup>           | Mutation in p53 binding interphase         |                             |
|                        | 53BP1 <sup>N1845A</sup>           |                                            |                             |
|                        | 53BP1 <sup>D1861R</sup>           | Mutation in p53 binding interphase         |                             |
|                        | 53BP1 <sup>D1861A</sup>           |                                            |                             |

**Sequences of primer pairs used throughout this study.**

| Target gene / locus           |     | Sequence (5'-3')             | Application                            |
|-------------------------------|-----|------------------------------|----------------------------------------|
| <i>CDKN1A</i> (p21)           | Fwd | CCTCATCCCGTGTTCCTTT          | Transcript-specific<br>qRT-PCR primers |
|                               | Rev | GTACCACCCAGCGGACAAGT         |                                        |
| <i>BAX</i>                    | Fwd | CCTTTTCTACTTTGCCAGCAAAC      |                                        |
|                               | Rev | GAGGCCGTCCCAACCAC            |                                        |
| <i>BBC3</i> ( <i>PUMA</i> )   | Fwd | CCTGGAGGGTCCTGTACAATCT       |                                        |
|                               | Rev | GCACCTAATTGGGCTCCATCT        |                                        |
| <i>TP53I3</i>                 | Fwd | AGGGTGAAGTCCTCCTGAAGGT       |                                        |
|                               | Rev | GTGGGTCATACTGGCCTTGCT        |                                        |
| <i>MDM2</i>                   | Fwd | GGCCTGCTTTACATGTGCAA         |                                        |
|                               | Rev | GCACAATCATTGAATTGGTTGTC      |                                        |
| <i>CDKN1A</i> (p21)<br>-2965  | Fwd | CCGCCAGTATATATTTTAAATTGAGA   | Locus-specific ChIP<br>primers         |
|                               | Rev | AGTGGTTAGTAATTTTCAGTTTGCTCAT |                                        |
| <i>CDKN1A</i> (p21)<br>-2283  | Fwd | AGCAGGCTGTGGCTCTGATT         |                                        |
|                               | Rev | CAAAATAGCCACCAGCCTCTTCT      |                                        |
| <i>CDKN1A</i> (p21)<br>-1391  | Fwd | CTGTCCTCCCCGAGGTCA           |                                        |
|                               | Rev | ACATCTCAGGCTGCTCAGAGTCT      |                                        |
| <i>CDKN1A</i> (p21)<br>-20    | Fwd | TATATCAGGGCCGCGCTG           |                                        |
|                               | Rev | GGCTCCACAAGGAAGTACTTC        |                                        |
| <i>CDKN1A</i> (p21)<br>+507   | Fwd | CCAGGAAGGGCGAGGAAA           |                                        |
|                               | Rev | GGGACCGATCCTAGACGAACTT       |                                        |
| <i>CDKN1A</i> (p21)<br>+4001  | Fwd | AGTCACTCAGCCCTGGAGTCAA       |                                        |
|                               | Rev | GGAGAGTGAGTTTGCCCATGA        |                                        |
| <i>CDKN1A</i> (p21)<br>+8566  | Fwd | CCTCCACAATGCTGAATATACAG      |                                        |
|                               | Rev | AGTCACTAAGAATCATTATTGAGCACC  |                                        |
| <i>CDKN1A</i> (p21)<br>+11443 | Fwd | TCTGTCTCGGCAGCTGACAT         |                                        |
|                               | Rev | ACCACAAAAGATCAAGGTGAGTGA     |                                        |
| <i>MDM2</i> 5'                | Fwd | GGGCTATTTAAACCATGCATTTTC     |                                        |
|                               | Rev | GTCCGTGCCACAGGTCTA           |                                        |
| <i>MDM2</i> 3'                | Fwd | CTTTCTCGAGGAGGCAGGTTT        |                                        |
|                               | Rev | GCTCAACCCTAGGCGCTATTC        |                                        |
| <i>GADD45A</i><br>p53-RE      | Fwd | GCCTTTGTCCGACTAGAGTGT        |                                        |
|                               | Rev | GGATCTCTCCGCTGCTG            |                                        |
| <i>FAS</i> p53-RE             | Fwd | GCACCGAAGCAGTGGTTAAG         |                                        |
|                               | Rev | GCCTCCAGAAGCTCATTGAG         |                                        |



***Antibodies used in this study.***

| <b>Target</b>        | <b>Manufacturer</b>                                                    | <b>Application</b>        |
|----------------------|------------------------------------------------------------------------|---------------------------|
| 53BP1                | Novus Biological (NB100-304)                                           | WB, Immunofluorescence    |
|                      | Novus Biological (NB100-305)                                           | WB                        |
|                      | Millipore (clone B13)                                                  | WB, Immunofluorescence    |
| MDM2                 | Santa Cruz Biotechnology (clone SMP14)                                 | WB                        |
| p53                  | Dako (clone DO-7)                                                      | WB, Immunofluorescence    |
|                      | Santa Cruz Biotechnology (clone DO-1)                                  | Immunoprecipitation, ChIP |
| p21                  | BD Transduction Laboratories                                           | WB                        |
| CHK2                 | Millipore (clone 7)                                                    | WB                        |
| pCHK2 <sup>T68</sup> | Cell signalling (clone C13C1)                                          | WB                        |
| USP28                | Abcam (EPR4249)                                                        | WB                        |
| HA-11                | Covance Research (Clone 16B12)                                         | WB                        |
| $\beta$ -actin       | Sigma-Aldrich                                                          | WB                        |
| $\alpha$ -tubulin    | Sigma-Aldrich (Tat-1)                                                  | WB                        |
| RIF1                 | Bethyl Laboratories (A300-569A)                                        | Immunofluorescence        |
| $\gamma$ -H2AX       | Millipore                                                              | Immunofluorescence        |
| Cyclin A             | Clone E23.1, a gift from Julian Gannon,<br>The Francis Crick Institute | Immunofluorescence        |

***Supplementary References***

Kim, D., Pertea, G., Trapnell, C., Pimentel, H., Kelley, R., Salzberg, S.L. (2013). TopHat2: accurate alignment of transcriptomes in the presence of insertions, deletions and gene fusions. *Genome Biol* 14, R36.

Lamble, S., Batty, E., Attar, M., Buck, D., Bowden, R., Lunter, G., Crook, D., El-Fahmawi, B., Piazza, P. (2013). Improved workflows for high throughput library preparation using the transposome-based nextera system. *BMC Biotech* 13, 104.

Lottersberger, F., Bothmer, A., Robbiani, D.F., Nussenzweig, M.C., and De Lange, T. (2013). Role of 53BP1 oligomerization in regulating double-strand break repair. *Proc. Natl. Acad. Sci. U.S.A.* 110, 2146–2151.

Robinson, M.D., McCarthy, D.J., Smyth, G.K. (2010). edgeR: a Bioconductor package for differential expression analysis of digital gene expression data. *Bioinformatics* 26, 139-140.
